# Supplementary material for: IL-4-Responsive B Cells Are Detrimental During Chronic Tuberculosis Infection in Mice
Source: PubMed Central journal article supplement (PMC8243286; doi:10.3389/fimmu.2021.611673), 2021-06-15
Supplement: Table_1.pdf [file Table_1.pdf]

**Supplementary Table 1: Antibody details**

| <b>Target Protein</b> | <b>Conjugation</b> | <b>Clone</b> | <b>Company</b> |
|-----------------------|--------------------|--------------|----------------|
| B220                  | BV510              | RA3-6B2      | Biolegend      |
| CD3                   | AF700              | 500A2        | Biolegend      |
| CD3                   | FITC               | 500A2        | BD Biosciences |
| CD4                   | PE                 | RM4-5        | Biolegend      |
| CD8                   | APC                | 53-6.7       | Biolegend      |
| CD19                  | APC-eFluor780      | 1D3          | Invitrogen     |
| CD19                  | PerCP-Cy5.5        | 1D3          | BD Biosciences |
| CD11c                 | APC                | HL3          | BD Biosciences |
| CD11b                 | PE                 | M1/70        | BD Biosciences |
| CD44                  | PE                 | IM7          | Biolegend      |
| CD124                 | PE/Biotin          | mIL4R-M1     | BD Biosciences |
| CD138                 | APC                | 281-2        | BD Biosciences |
| MHC II                | FITC               | 2G9          | BD Biosciences |
| MHCII                 | AF700              | M5/114.15.2  | Invitrogen     |
| Siglec F              | PE                 | E50-2440     | BD Biosciences |
| Gr-1                  | FITC               | RB6-8C5      | Biolegend      |
| IgM                   | Biotin             | RMM-1        | Biolegend      |
| CD5                   | APC                | 53-7.3       | BD Biosciences |
| CD43                  | PE                 | S7           | BD Biosciences |
| IgD                   | FITC               | 11-26c.2a    | BD Biosciences |
| CD1d                  | PerCP-Cy5.5        | 1B1          | BD Biosciences |
| Streptavidin          | PE-Dazzle594       | n/a          | Biolegend      |
| IL10                  | PE                 | JES5-1663    | Invitrogen     |
