# Supplementary material for: IL-4-Responsive B Cells Are Detrimental During Chronic Tuberculosis Infection in Mice
Source: PubMed Central journal article supplement (PMC8243286; doi:10.3389/fimmu.2021.611673), 2021-06-15
Supplement: Table_2.pdf [file Table_2.pdf]

**Supplementary Table 2: qPCR primers**

| <b>Gene</b>       | <b>Sequences</b>              |
|-------------------|-------------------------------|
| Tnf forward       | 5'-TCTCATCAGTTCTATGGCCC-3'    |
| Tnf reverse       | 5'-GGGAGTAGACAAGGTACAAC-3'    |
| Stat1 forward     | 5'-CCATGTCTCCAGAGGAGTTTGAT-3' |
| Stat1 reverse     | 5'-GTCGCCAGAGAGAAATTCGTG-3'   |
| Ifnb forward      | 5'-CAGCTCCAAGAAAGGACGAAC-3'   |
| Ifnb reverse      | 5'-GGCAGTGTA ACTCTTCTGCAT-3'  |
| Il10 forward      | 5'-AGCCGGGAAGACAATAACTG-3'    |
| Il10 reverse      | 5'-CATTTCCGATAAGGCTTGG-3'     |
| Il6 forward       | 5'-CGTGGAATGAGAAAAGAGTTGTG-3' |
| Il6 reverse       | 5'-ATCTCTCTGAAGGACTCTGGCT-3'  |
| GLTg1 forward     | 5'-CAGCCTGGTGTCAACTAG-3'      |
| GLTg1 reverse     | 5'-CTGTACATATGCAAGGCT-3'      |
| Hprt forward      | 5'-GTTGGATATGCCCTTGAC-3'      |
| Hprt reverse      | 5'-AGGACTAGAACACCTGCT-3'      |
| Gapdh forward     | 5'-TTCACCACCATGGAGAAGGC-3'    |
| Gapdh reverse     | 5'-GGCATGGACTGTGGTCATGA-3'    |
| Hs_IL-4Ra forward | 5'-CACCTATGCAGTCAACATTTGGA-3' |
| Hs_IL-4Ra reverse | 5'-GATGCGGAGGGAGGGTTCTA-3'    |
| Hs_Arg forward    | 5'-TCTACAAAACAGGGCTACTCTCA-3' |
| Hs_Arg reverse    | 5'-GAGCAAGTCCGAAACAAGCC-3'    |
| Hs_Hprt forward   | 5'-AGGCGAACCTCTCGGCTTT-3'     |
| Hs_Hprt reverse   | 5'-AAGACGTTTCAGTCCTGTCCAT-3'  |
